# Supplementary material for: COVID-19-Related Psychosocial Care in General Hospitals: Results of an Online Survey of Psychosomatic, Psychiatric, and Psychological Consultation and Liaison Services in Germany, Austria, and Switzerland
Source: Frontiers journal article supplement (doi:10.3389/fpsyt.2022.870984), 2022-06-24
Supplement: Data_Sheet_1.PDF [file Data_Sheet_1.PDF]

**Online survey  
of the Psychosomatic Consultation-Liaison Working Group  
on dealing with the COVID-19 pandemic**

# **Online survey**

**Welcome! Willkommen! Bienvenue! Benvenuti!**

**Please first select the language (English, German, French, Italian)  
at the top right of this page.**

**Bitte wählen Sie zuerst oben rechts auf dieser Seite die Sprache  
aus (Englisch, Deutsch, Französisch, Italienisch).**

**Veuillez d'abord sélectionner la langue en haut à droite de cette  
page (anglais, allemand, français, italien)**

**Si prega di selezionare la lingua in alto a destra in questa pagina  
(inglese, tedesco, francese, italiano).**

**Dear colleagues**

The COVID-19 pandemic raised new challenges in supporting patients, relatives and staff for psychosomatic, psychiatric and psychological consultation and liaison (C&L) services in general hospitals. We want to build upon the experience gained so far in order to be well prepared for the future.

Therefore, we kindly ask you to participate in the survey.

The aims of this survey are

- (1) To summarize the efforts made in psychosocial care in the context of the COVID-19 pandemic.
- (2) To assess the experiences made with the established services so far.
- (3) To assess the need for networking, cooperation and support.
- (4) Improvement of psychosocial care in acute hospitals in the context of pandemics.

The survey is being led by the Psychosomatic Consultation-Liaison Working Group of the German College of Psychosomatic Medicine (DKPM) and the German Society for Psychosomatic Medicine and Medical Psychotherapy (DGPM) in cooperation with the Swiss Academy for Psychosomatic and Psychosocial Medicine (SAPPM), the Swiss Society for Consultant-Liaison Psychiatry and Psychosomatics (SSCLPP) and the Austrian Society for Psychosomatics and Psychotherapeutic Medicine (ÖGPPM).

Only one person per psychosomatic, psychiatric or psychological C&L service should take part, in agreement with the respective management.

Participation in this survey is possible without mentioning your name.  
Registration is not required for participation.

Only pseudonymised data is collected and processed. Completing the questionnaire takes about 15 minutes. Your participation in the survey is voluntary. You can cancel the survey at any time and without giving reasons. This will not affect you adversely in any way. You also have the right to information and correction, the right to deletion, the right to restriction and the right to data portability (Art. 13 para. 2 lit. b) of the processed and not yet fully anonymised data, as well as the possibility to revoke your consent even after completion of the questionnaire. For this purpose, we ask you to generate an individual code at the beginning of the survey, which allows us to pseudonymise and thus identify the corresponding data set if necessary.

Data collection is carried out with the online survey tool Questback EFS Fall 2019 / licence model "Unipark" of Questback GmbH via the University of Basel. Questback stores the data collected via the tool in the server park in Frankfurt. This is reliably protected from external access. The BSI-certified data centre is subject to extremely high data protection and security requirements according to ISO 27001 based on IT-Grundschutz. Subsequently, the data is stored, processed and statistically evaluated at the University of Basel and the University Hospital Basel. Further processing of the data and interpretation of the results is carried out in cooperation with German, Austrian and Swiss members of the above-mentioned working groups and societies. For this purpose, completely anonymised data sets will be passed on to the participating members of the working groups and societies if necessary.

After completion of the study, all data will be stored and archived on a secure server of the University of Basel or the University Hospital Basel in accordance with applicable law (in particular the European Data Protection Regulation, DSGVO, and Swiss data protection law). The duration of data retention is 10 years.

The personal data (individual code; perspective from which you answer the survey) collected in this study are kept to a minimum.

In the context of this study, publications are planned by the various institutions involved. In case of publication of study results, the confidentiality of your data remains guaranteed.

To start the survey, please confirm your consent and the related clarification below.

If you have any questions or comments about this study or would like to be informed about the research results, please feel free to contact us.

Thank you very much for your participation and kind regards.

- Prof. Dr. med. Rainer Schäfert, Basel
- Dr. phil. Dipl.-Psych. Barbara Stein, Nürnberg
- Dr. med. Frank Vitinius, Köln
- PD Dr. med. Christian Fazekas, Graz

Contact details:

- Prof. Dr. med. Rainer Schäfert  
University Hospital Basel, Clinic for Psychosomatics, Hebelstrasse 2, CH-4031 Basel, Tel.: +41 61 265 52 94, eMail: [covid-survey-medizin@unibas.ch](mailto:covid-survey-medizin@unibas.ch)
- Dr. phil. Dipl.-Psych. Barbara Stein  
Nuremberg Hospital, Paracelsus Medical Private University Nuremberg, Clinic for Psychosomatic Medicine and Psychotherapy,  
Prof. Ernst-Nathan-Str. 1, 08.U1.118, D-90419 Nuremberg, Tel.: +49 911 398-113673 or -2839, eMail: [barbara.stein@klinikum-nuernberg.de](mailto:barbara.stein@klinikum-nuernberg.de)
- Frank Vitinius, MD  
University Hospital Cologne, Clinic and Polyclinic for Psychosomatics and Psychotherapy, Kerpener Str. 62, D-50937 Köln (Cologne), Tel.: +49 221 478 98649, eMail: [frank.vitinius@uk-koeln.de](mailto:frank.vitinius@uk-koeln.de)
- PD Dr. med. Christian Fazekas  
Medical University of Graz - University Hospital Graz, University Department of Medical Psychology and Psychotherapy, Auenbruggerplatz 3, A-8036 Graz, Tel.: +43 316 385 12516, eMail: [christian.fazekas@medunigraz.at](mailto:christian.fazekas@medunigraz.at)

.

---

I hereby give my consent that the answers submitted by me within the framework of the study and relating to my institution may be stored and evaluated at the University of Basel and the University Hospital Basel in pseudonymised form, passed on in anonymised form to the other participating institutions in Germany and Austria and used to answer scientific questions. Furthermore, I agree that the data may be used in anonymised form for scientific presentations and publications. I acknowledge that I can cancel my participation at any time without giving reasons.

☐ I have been informed that I can terminate my participation in the study at any time. This also includes the right to revoke my consent to data processing. In this case, the personal reference to the data will be deleted.

The following ethics committees were consulted and the necessary ethics approvals or declarations of non-responsibility were obtained in accordance with the legal requirements: vote of the ethics committees of the Medical Faculty of the University of Cologne (20-1416), declaration of the Ethics Committee Northwestern and Central Switzerland (EKNZ) (Req-2020-00861).

I have been informed that the data collected will be stored, passed on and analysed in pseudonymised form. The pseudonymisation process takes place by asking the respondent to generate a personal code instead of their full name. This code serves

as a key that can only be reproduced by the respondent, but not - without disproportionate effort - by the study management or by third parties.

- You are not recognisable as a person in the evaluation. Furthermore, you are granted the right to information and correction of incorrectly processed data. You have the right to inspect your data that is collected during the study. If you discover errors in your data, you have the right to have them corrected by Prof. Dr. med. Rainer Schäfert. If you have any questions about the study, you can contact the persons listed below.
- For participants from the European Union: I have been informed that my data will be transferred to a third country - in this case Switzerland - outside the EU by entering the data directly on the survey platform and the server is located in Switzerland (cf. Art. 13 Para. 1 lit. c and f DSGVO). The European Commission has established an adequate legal level of data protection in Switzerland (so-called adequacy decision). You can find this adequacy decision at [https://edps.europa.eu/data-protection/data-protection/glossary/a\\_de](https://edps.europa.eu/data-protection/data-protection/glossary/a_de).
- We are generally obliged to provide you with a copy of your personal data free of charge. (Art. 15 para. 3 DSGVO).
- You have the right to contact the responsible data protection officers:
  - University Hospital Basel: Danielle Kaufmann; eMail: [danielle.kaufmann@unibas.ch](mailto:danielle.kaufmann@unibas.ch) or [Datenschutzbeauftragte@usb.ch](mailto:Datenschutzbeauftragte@usb.ch).
  - Medical University of Graz: Univ.-Prof. Dr. Thomas Wagner; eMail: [datenschutz@medunigraz.at](mailto:datenschutz@medunigraz.at)
  - University of Cologne: 1st Data Protection Officer of the University of Cologne: eMail: [dsb@verw.uni-koeln.de](mailto:dsb@verw.uni-koeln.de); 2nd Data Protection Officer of the University Hospital Cologne: [datenschutz@uk-koeln.de](mailto:datenschutz@uk-koeln.de).

You also have the right to lodge a complaint with the competent supervisory authority for data protection: The State Commissioner for Data Protection of North Rhine-Westphalia, Kavalleriestrasse 2-4, 40213 Düsseldorf, Germany.

|           |                                                                                                                                                                                                                                                                                                                                     |
|-----------|-------------------------------------------------------------------------------------------------------------------------------------------------------------------------------------------------------------------------------------------------------------------------------------------------------------------------------------|
| <b>1.</b> | <p>We would like to make it possible for your details to be subsequently deleted at your request, but without asking you to give your name for this purpose. Therefore, we ask you to generate a code that only you know and that we can use to identify your record if necessary. The code consists of the following elements:</p> |
|           | <ol style="list-style-type: none"> <li>1. First letter of the mother's first name</li> <li>2. First letter of the father's first name</li> <li>3. Day of birth of the mother in two digits (if 15.03.1948, then 15)</li> <li>4. Year of birth of the mother in two digits (if 1948, then 48).</li> </ol> <p>My code: _____</p>      |

|            |                                                                                            |
|------------|--------------------------------------------------------------------------------------------|
| <b>2.</b>  | <b>Questions about the hospital and department to which this survey refers:</b>            |
| <b>2.a</b> | <b>Which hospital do your responses refer to?</b>                                          |
|            | 1 Name of hospital (free text): .....<br>.....<br>2 Department (free text): .....<br>..... |
| <b>2.b</b> | <b>In which city is your hospital (mainly) located?</b>                                    |
|            | (free text):<br>.....                                                                      |

|           |                                                                             |                                                                                                                                                                                                                                                                                                                                                                                                                                                                                                                                                                                                                                                                                                                                                         |
|-----------|-----------------------------------------------------------------------------|---------------------------------------------------------------------------------------------------------------------------------------------------------------------------------------------------------------------------------------------------------------------------------------------------------------------------------------------------------------------------------------------------------------------------------------------------------------------------------------------------------------------------------------------------------------------------------------------------------------------------------------------------------------------------------------------------------------------------------------------------------|
| <b>3.</b> | <b>In which state and federal state or canton is your hospital located?</b> |                                                                                                                                                                                                                                                                                                                                                                                                                                                                                                                                                                                                                                                                                                                                                         |
|           | 1 <input type="checkbox"/> Deutschland                                      | 1.1 <input type="checkbox"/> Baden-Württemberg<br>1.2 <input type="checkbox"/> Bavaria<br>1.3 <input type="checkbox"/> Berlin<br>1.4 <input type="checkbox"/> Brandenburg<br>1.5 <input type="checkbox"/> Bremen<br>1.6 <input type="checkbox"/> Hamburg<br>1.7 <input type="checkbox"/> Hesse<br>1.8 <input type="checkbox"/> Mecklenburg-Western Pomerania<br>1.9 <input type="checkbox"/> Lower Saxony<br>1.10 <input type="checkbox"/> North Rhine-Westphalia<br>1.11 <input type="checkbox"/> Rhineland-Palatinate<br>1.12 <input type="checkbox"/> Saarland<br>1.13 <input type="checkbox"/> Saxony<br>1.14 <input type="checkbox"/> Saxony-Anhalt<br>1.15 <input type="checkbox"/> Schleswig-Holstein<br>1.16 <input type="checkbox"/> Thuringia |

|  |                                               |                                                                                                                                                                                                                                                                                                                                                                                                                                                                                                                                                                                                                                                                                                                                                                                                                                                                                                                                                                                                                                                                                                                             |
|--|-----------------------------------------------|-----------------------------------------------------------------------------------------------------------------------------------------------------------------------------------------------------------------------------------------------------------------------------------------------------------------------------------------------------------------------------------------------------------------------------------------------------------------------------------------------------------------------------------------------------------------------------------------------------------------------------------------------------------------------------------------------------------------------------------------------------------------------------------------------------------------------------------------------------------------------------------------------------------------------------------------------------------------------------------------------------------------------------------------------------------------------------------------------------------------------------|
|  | <sup>2</sup> <input type="checkbox"/> Austria | 2.1 <input type="checkbox"/> Vorarlberg<br>2.2 <input type="checkbox"/> Tyrol<br>2.3 <input type="checkbox"/> Salzburg<br>2.4 <input type="checkbox"/> Carinthia<br>2.5 <input type="checkbox"/> Styria<br>2.6 <input type="checkbox"/> Upper Austria<br>2.7 <input type="checkbox"/> Lower Austria<br>2.8 <input type="checkbox"/> Burgenland<br>2.9 <input type="checkbox"/> Vienna                                                                                                                                                                                                                                                                                                                                                                                                                                                                                                                                                                                                                                                                                                                                       |
|  | <sup>3</sup> <input type="checkbox"/> Schweiz | 2.1 <input type="checkbox"/> Aargau<br>2.2 <input type="checkbox"/> Appenzell Innerrhoden<br>2.3 <input type="checkbox"/> Appenzell Ausserrhoden<br>2.4 <input type="checkbox"/> Berne<br>2.5 <input type="checkbox"/> Basel Country<br>2.6 <input type="checkbox"/> Basel City<br>2.7 <input type="checkbox"/> Fribourg<br>2.8 <input type="checkbox"/> Geneva<br>2.9 <input type="checkbox"/> Glarus<br>2.10 <input type="checkbox"/> Grisons<br>2.11 <input type="checkbox"/> Jura<br>2.12 <input type="checkbox"/> Lucerne<br>2.13 <input type="checkbox"/> Neuchâtel<br>2.14 <input type="checkbox"/> Nidwalden<br>2.15 <input type="checkbox"/> Obwalden<br>2.16 <input type="checkbox"/> St.Gallen<br>2.17 <input type="checkbox"/> Schaffhausen<br>2.18 <input type="checkbox"/> Solothurn<br>2.19 <input type="checkbox"/> Schwyz<br>2.20 <input type="checkbox"/> Thurgau<br>2.21 <input type="checkbox"/> Ticino<br>2.22 <input type="checkbox"/> Uri<br>2.23 <input type="checkbox"/> Vaud<br>2.24 <input type="checkbox"/> Valais<br>2.25 <input type="checkbox"/> Zug<br>2.26 <input type="checkbox"/> Zurich |

|           |                                                                                                                                                                                                                                                                                                                                                    |
|-----------|----------------------------------------------------------------------------------------------------------------------------------------------------------------------------------------------------------------------------------------------------------------------------------------------------------------------------------------------------|
| <b>4.</b> | <b>What type of hospital do you work in?</b><br><i>Please select only one of the following answers (single choice):</i>                                                                                                                                                                                                                            |
|           | <sup>1</sup> <input type="checkbox"/> University hospital<br><sup>2</sup> <input type="checkbox"/> General hospital<br><sup>3</sup> <input type="checkbox"/> Specialized hospital<br><sup>4</sup> <input type="checkbox"/> Attending hospital<br><sup>5</sup> <input type="checkbox"/> Other type of hospital, if yes, which (free text):<br>..... |

|           |                                                                                                                                                                                                                                                                                                                                           |
|-----------|-------------------------------------------------------------------------------------------------------------------------------------------------------------------------------------------------------------------------------------------------------------------------------------------------------------------------------------------|
| <b>5.</b> | <b>Which type of ownership does your hospital have?</b><br><i>Please select only one of the following answers (single choice).</i>                                                                                                                                                                                                        |
|           | <sup>1</sup> <input type="checkbox"/> Private ownership<br><sup>2</sup> <input type="checkbox"/> Non-profit ownership (e.g. church organisation)<br><sup>3</sup> <input type="checkbox"/> Public providers (incl. institutions under public law / public limited companies etc.)<br><sup>4</sup> <input type="checkbox"/> Other ownership |

|           |                                                        |
|-----------|--------------------------------------------------------|
| <b>6.</b> | <b>How many beds does your hospital have in total?</b> |
|           | _____ (state number)                                   |

|           |                                                                                                                 |
|-----------|-----------------------------------------------------------------------------------------------------------------|
| <b>7.</b> | <b>From which professional perspective are you answering this survey?</b><br><i>(multiple answers possible)</i> |
|-----------|-----------------------------------------------------------------------------------------------------------------|

|  |                                                                                                                                                                                                                                                                                                                                                                                                                                                                     |
|--|---------------------------------------------------------------------------------------------------------------------------------------------------------------------------------------------------------------------------------------------------------------------------------------------------------------------------------------------------------------------------------------------------------------------------------------------------------------------|
|  | <sup>1</sup> <input type="checkbox"/> Psychosomatic Medicine<br><sup>2</sup> <input type="checkbox"/> Psychiatry<br><sup>3</sup> <input type="checkbox"/> Child and adolescent psychiatry and psychosomatics<br><sup>4</sup> <input type="checkbox"/> Medical psychology<br><sup>5</sup> <input type="checkbox"/> Psychological service / Psychological department<br><sup>6</sup> <input type="checkbox"/> other, if yes, which ( <i>free text</i> ):<br>.....<br> |
|--|---------------------------------------------------------------------------------------------------------------------------------------------------------------------------------------------------------------------------------------------------------------------------------------------------------------------------------------------------------------------------------------------------------------------------------------------------------------------|

|           |                                                                                                                                                                                                                                                                                                                                                                    |
|-----------|--------------------------------------------------------------------------------------------------------------------------------------------------------------------------------------------------------------------------------------------------------------------------------------------------------------------------------------------------------------------|
| <b>8.</b> | <b>Which psychosocial services are available in your hospital?</b><br><i>(multiple answers possible)</i>                                                                                                                                                                                                                                                           |
|           | <sup>1</sup> <input type="checkbox"/> Psychosomatic consultation & liaison service<br><sup>2</sup> <input type="checkbox"/> Psychiatric consultation & liaison service<br><sup>3</sup> <input type="checkbox"/> Psychological consultation & liaison service<br><sup>4</sup> <input type="checkbox"/> other, if yes, which ( <i>free text</i> ):<br>.....<br>..... |

|           |                                                                                                                                                                                                                                                                                                                                                               |
|-----------|---------------------------------------------------------------------------------------------------------------------------------------------------------------------------------------------------------------------------------------------------------------------------------------------------------------------------------------------------------------|
| <b>9.</b> | <b>How many full-time equivalents does the consultation-liaison service of your own department have?</b><br><i>(Please answer in the form of a number in each case)</i>                                                                                                                                                                                       |
|           | <sup>1</sup> <input type="checkbox"/> Physician positions: _____<br><sup>2</sup> <input type="checkbox"/> Psychologist positions: _____<br><sup>3</sup> <input type="checkbox"/> Social worker positions: _____<br><sup>4</sup> <input type="checkbox"/> Nursing positions: _____<br><sup>5</sup> <input type="checkbox"/> Other full-time equivalents: _____ |



|             |                                                                                                                                                                |
|-------------|----------------------------------------------------------------------------------------------------------------------------------------------------------------|
| <b>10.</b>  | <b>Involvement of your hospital in the somatic care of COVID-19 patients since the beginning of the pandemic.</b>                                              |
| <b>10.a</b> | <b>What has been/is the maximum level of involvement of your hospital in the <i>somatic care</i> of COVID-19 patients since the beginning of the pandemic?</b> |
|             | <p style="text-align: center;"><b>0 – 1 – 2 – 3 – 4 – 5</b><br/> <b>(0 = not at all to 5 = very strongly)</b></p>                                              |
| <b>10.b</b> | <b>To what extent was/is your hospital maximally occupied regarding the <i>somatic care</i> of COVID-19 patients?</b>                                          |
|             | <p style="text-align: center;"><b>0 – 1 – 2 – 3 – 4 – 5</b><br/> <b>(0 = not at all to 5 = very strongly)</b></p>                                              |

|            |                                                                                                                                                                                                                                                                                                                                                   |
|------------|---------------------------------------------------------------------------------------------------------------------------------------------------------------------------------------------------------------------------------------------------------------------------------------------------------------------------------------------------|
| <b>11.</b> | <b>Where were/are COVID-19 patients treated as inpatients in your hospital?</b><br><i>(multiple answers possible)</i>                                                                                                                                                                                                                             |
|            | <p><sup>1</sup> <input type="checkbox"/> specially designated ward(s) for suspected cases</p> <p><sup>2</sup> <input type="checkbox"/> specifically designated ward(s) for COVID-19 patients</p> <p><sup>3</sup> <input type="checkbox"/> specially designated intensive care unit(s)/beds</p> <p><sup>4</sup> <input type="checkbox"/> other</p> |

|            |                                                                                                                                                      |
|------------|------------------------------------------------------------------------------------------------------------------------------------------------------|
| <b>12.</b> | <b>Have other special structures for <i>somatic care</i> related to COVID-19 been established in your hospital?</b>                                  |
|            | <p><sup>1</sup> <input type="checkbox"/> no</p> <p><sup>2</sup> <input type="checkbox"/> yes and specifically <i>(multiple answers possible)</i></p> |

|  |                                                                                                                  |
|--|------------------------------------------------------------------------------------------------------------------|
|  | 2.1 <input type="checkbox"/> Additional places for intensive care treatment                                      |
|  | 2.2 <input type="checkbox"/> Additional places for artificial ventilation                                        |
|  | 2.3 <input type="checkbox"/> Transformation of regular wards/areas for the treatment of COVID-19 patients        |
|  | 2.4 <input type="checkbox"/> Transformation of regular wards/areas for the treatment of suspected COVID-19 cases |
|  | 2.5 <input type="checkbox"/> Outpatient assessment / testing centre for SARS-CoV-2/COVID-19                      |
|  | 2.6 <input type="checkbox"/> Expansion of specific laboratory capacities for testing for SARS-CoV-2              |

|             |                                                                                                                                                                                                                                                                                                                               |
|-------------|-------------------------------------------------------------------------------------------------------------------------------------------------------------------------------------------------------------------------------------------------------------------------------------------------------------------------------|
| <b>13.a</b> | <b>Has any COVID-19 related psychosocial care been provided at your facility?</b>                                                                                                                                                                                                                                             |
|             | <sup>1</sup> <input type="checkbox"/> No COVID-19 related psychosocial care has been provided at our facility.<br><sup>2</sup> <input type="checkbox"/> COVID-19 related psychosocial care has been provided at our facility.                                                                                                 |
| <b>13.b</b> | <b>If at your facility COVID-19-related psychosocial care has been/is provided, how is the time spent on this care by the C&amp;L mental health team in your hospital/department divided among the three target groups during the busiest times, roughly estimated in percentage terms?</b><br><i>(should add up to 100%)</i> |
|             | Patients: _____%<br>Relatives: _____%<br>Staff members: _____%<br><b>Total:                100 %</b>                                                                                                                                                                                                                          |

|            |                                                                                                                                                                                                                                                                                                                                                                                                                                                                                                                                                                 |
|------------|-----------------------------------------------------------------------------------------------------------------------------------------------------------------------------------------------------------------------------------------------------------------------------------------------------------------------------------------------------------------------------------------------------------------------------------------------------------------------------------------------------------------------------------------------------------------|
| <b>14.</b> | <b>Have cooperation structures been established within the hospital for psychosocial support in the context of the COVID-19 pandemic?</b>                                                                                                                                                                                                                                                                                                                                                                                                                       |
|            | <sup>1</sup> <input type="checkbox"/> no<br><sup>2</sup> <input type="checkbox"/> yes - if yes, who was involved? ( <i>multiple answers possible</i> )                                                                                                                                                                                                                                                                                                                                                                                                          |
|            | <sup>3</sup> <input type="checkbox"/> Psychosomatic Medicine<br><sup>4</sup> <input type="checkbox"/> Psychiatry<br><sup>5</sup> <input type="checkbox"/> Palliative care<br><sup>6</sup> <input type="checkbox"/> Psychology/medical psychology<br><sup>7</sup> <input type="checkbox"/> Psycho-oncology<br><sup>8</sup> <input type="checkbox"/> Pastoral care<br><sup>9</sup> <input type="checkbox"/> Social services<br><sup>10</sup> <input type="checkbox"/> Nursing team<br><sup>11</sup> <input type="checkbox"/> other ( <i>free text</i> ):<br>..... |

|            |                                                                                                                                                                                                                                                                                                                                          |
|------------|------------------------------------------------------------------------------------------------------------------------------------------------------------------------------------------------------------------------------------------------------------------------------------------------------------------------------------------|
| <b>15.</b> | <b>What structures for psychosocial care in the corona pandemic were developed in your hospital?</b><br>( <i>multiple answers possible</i> )                                                                                                                                                                                             |
|            | <sup>1</sup> <input type="checkbox"/> New care structures have been established.<br><sup>2</sup> <input type="checkbox"/> Existing care structures were further developed.<br><sup>3</sup> <input type="checkbox"/> The care structure remained unchanged.<br><sup>4</sup> <input type="checkbox"/> No psychosocial care was/is possible |
|            | Comment ( <i>optional</i> ):<br>.....                                                                                                                                                                                                                                                                                                    |

|            |                                                                                                                          |
|------------|--------------------------------------------------------------------------------------------------------------------------|
| <b>16.</b> | <b>Has a specific representative been appointed for psychosocial issues in the pandemic task force of your hospital?</b> |
|------------|--------------------------------------------------------------------------------------------------------------------------|

|  |                                                                                                                                                                                                                                                                                                                              |
|--|------------------------------------------------------------------------------------------------------------------------------------------------------------------------------------------------------------------------------------------------------------------------------------------------------------------------------|
|  | <sup>1</sup> <input type="checkbox"/> no<br><sup>2</sup> <input type="checkbox"/> yes and specifically: <i>(multiple answers possible)</i>                                                                                                                                                                                   |
|  | <sup>3</sup> Internal person: Designation of a responsible person from the psychosocial departments<br><input type="checkbox"/> Internal person: regular participation in meetings of the pandemic task force<br><input type="checkbox"/> Internal person: selective participation in meetings of the pandemic task force    |
|  | <sup>4</sup> External person: Designation of a responsible person outside the psychosocial departments<br><input type="checkbox"/> External person: regular participation in meetings of the pandemic task force<br><input type="checkbox"/> External person: selective participation in meetings of the pandemic task force |
|  | Comment <i>(optional)</i> :<br>.....                                                                                                                                                                                                                                                                                         |

|            |                                                                                                                                                                                                                                                                                                                                                                                                                                                                                                                                                                                                                                                                                                                     |
|------------|---------------------------------------------------------------------------------------------------------------------------------------------------------------------------------------------------------------------------------------------------------------------------------------------------------------------------------------------------------------------------------------------------------------------------------------------------------------------------------------------------------------------------------------------------------------------------------------------------------------------------------------------------------------------------------------------------------------------|
| <b>17.</b> | <b>What was/is the <u>maximum</u> availability of psychosocial care for COVID-19 patients in terms of time?</b><br><i>(multiple answers possible)</i>                                                                                                                                                                                                                                                                                                                                                                                                                                                                                                                                                               |
|            | <sup>1</sup> <input type="checkbox"/> daily for 24 hours<br><sup>2</sup> <input type="checkbox"/> daily, from 8 a.m. to midnight<br><sup>3</sup> <input type="checkbox"/> daily, during regular working hours, e.g. 8 a.m. to 5 p.m.<br><sup>4</sup> <input type="checkbox"/> Monday to Friday, 24 hours a day<br><sup>5</sup> <input type="checkbox"/> Monday to Friday, during regular working hours, e.g. 8 a.m. to 5 p.m.<br><sup>6</sup> <input type="checkbox"/> less than 5 selected days per week<br><sup>7</sup> <input type="checkbox"/> In addition to the above hours, there was on-call or stand-by duty.<br><sup>8</sup> <input type="checkbox"/> other – how? <i>(free text)</i> :<br>.....<br>..... |

|     |                                                                                                                                                  |                                                                                                                              |                                                                                                                                    |
|-----|--------------------------------------------------------------------------------------------------------------------------------------------------|------------------------------------------------------------------------------------------------------------------------------|------------------------------------------------------------------------------------------------------------------------------------|
| 18. | Have specific offers or procedures of psychosocial support <u>for patients</u> been established in your hospital in the context of COVID-19?     |                                                                                                                              | To what extent have these procedures / offers proven successful?<br>0 – 1 – 2 – 3 – 4 – 5<br>(0 = not at all to 5 = very strongly) |
|     | <sup>1</sup> <input type="checkbox"/> no<br><sup>2</sup> <input type="checkbox"/> yes – If yes, which ones? ( <i>Multiple answers possible</i> ) |                                                                                                                              |                                                                                                                                    |
|     |                                                                                                                                                  | <sup>3</sup> <input type="checkbox"/> Specific procedures / <i>Standard Operation Procedures (SOPs)</i> for common questions | 0 – 1 – 2 – 3 – 4 – 5                                                                                                              |
|     |                                                                                                                                                  | <sup>4</sup> <input type="checkbox"/> Consultation staff specifically for corona referrals                                   | 0 – 1 – 2 – 3 – 4 – 5                                                                                                              |
|     |                                                                                                                                                  | <sup>5</sup> <input type="checkbox"/> Liaison staff on COVID wards                                                           | 0 – 1 – 2 – 3 – 4 – 5                                                                                                              |
|     |                                                                                                                                                  | <sup>6</sup> <input type="checkbox"/> Psychosocial Corona-Care-Team                                                          | 0 – 1 – 2 – 3 – 4 – 5                                                                                                              |
|     |                                                                                                                                                  | <sup>7</sup> <input type="checkbox"/> Corona telephone hotline                                                               | 0 – 1 – 2 – 3 – 4 – 5                                                                                                              |
|     |                                                                                                                                                  | <sup>8</sup> <input type="checkbox"/> Corona outpatient clinic                                                               | 0 – 1 – 2 – 3 – 4 – 5                                                                                                              |
|     | <sup>9</sup> <input type="checkbox"/> Aftercare services for patients with post-COVID syndrome                                                   | 0 – 1 – 2 – 3 – 4 – 5                                                                                                        |                                                                                                                                    |

|  |                                                                                                                         |                                  |
|--|-------------------------------------------------------------------------------------------------------------------------|----------------------------------|
|  | <sup>10</sup> <input type="checkbox"/> other – what? ( <i>free text</i> ):<br>.....<br>.....<br>.....<br>.....<br>..... | <b>0 – 1 – 2 – 3 –<br/>4 – 5</b> |
|  |                                                                                                                         |                                  |

|            |                                                                                                                                                   |                                                                                                                                             |
|------------|---------------------------------------------------------------------------------------------------------------------------------------------------|---------------------------------------------------------------------------------------------------------------------------------------------|
| <b>19.</b> | <b>Have specific offers or procedures of psychosocial support <u>for relatives</u> been established in the COVID-19 context in your hospital?</b> | <b>To what extent have these procedures / offers proven successful?<br/>0 – 1 – 2 – 3 – 4 – 5<br/>(0 = not at all to 5 = very strongly)</b> |
|            | <sup>1</sup> <input type="checkbox"/> no<br><sup>2</sup> <input type="checkbox"/> yes – If yes, which ones? ( <i>multiple answers possible</i> )  |                                                                                                                                             |
|            | <sup>3</sup> <input type="checkbox"/> Specific procedures / Standard Operation Procedures (SOPs) for supporting relatives                         | <b>0 – 1 – 2 – 3 – 4 – 5</b>                                                                                                                |
|            | <sup>4</sup> <input type="checkbox"/> Corona telephone hotline also for relatives                                                                 | <b>0 – 1 – 2 – 3 – 4 – 5</b>                                                                                                                |
|            | <sup>5</sup> <input type="checkbox"/> Specific counselling offer for relatives                                                                    | <b>0 – 1 – 2 – 3 – 4 – 5</b>                                                                                                                |
|            | <sup>6</sup> <input type="checkbox"/> other – what? ( <i>free text</i> ):<br>.....<br>.....<br>.....<br>.....<br>.....                            | <b>0 – 1 – 2 – 3 – 4 – 5</b>                                                                                                                |

|            |                                                                                                                                                         |                                                                                                                                             |
|------------|---------------------------------------------------------------------------------------------------------------------------------------------------------|---------------------------------------------------------------------------------------------------------------------------------------------|
| <b>20.</b> | <b>Have specific offers or procedures of psychosocial support <u>for staff</u> been established in the COVID-19 context in your hospital?</b>           | <b>To what extent have these procedures / offers proven successful?<br/>0 – 1 – 2 – 3 – 4 – 5<br/>(0 = not at all to 5 = very strongly)</b> |
|            | <sup>1</sup> <input type="checkbox"/> no<br><sup>2</sup> <input type="checkbox"/> yes – If yes, which ones? ( <i>multiple answers possible</i> )        |                                                                                                                                             |
|            | <sup>3</sup> <input type="checkbox"/> Case discussions on patient-related stressful situations                                                          | <b>0 – 1 – 2 – 3 – 4 – 5</b>                                                                                                                |
|            | <sup>4</sup> <input type="checkbox"/> Team supervision / facilitated group exchange on how the corona situation is experienced as staff and in the team | <b>0 – 1 – 2 – 3 – 4 – 5</b>                                                                                                                |
|            | <sup>5</sup> <input type="checkbox"/> Consultation hours/counselling for staff                                                                          | <b>0 – 1 – 2 – 3 – 4 – 5</b>                                                                                                                |
|            | <sup>6</sup> <input type="checkbox"/> Telephone hotline for staff                                                                                       | <b>0 – 1 – 2 – 3 – 4 – 5</b>                                                                                                                |
|            | <sup>7</sup> <input type="checkbox"/> Targeted work with team leaders/supervisors on helpful support measures for staff/teams                           | <b>0 – 1 – 2 – 3 – 4 – 5</b>                                                                                                                |
|            | <sup>8</sup> <input type="checkbox"/> Training in dealing with psychosocial stress of patients and relatives (recognition, communication, management)   | <b>0 – 1 – 2 – 3 – 4 – 5</b>                                                                                                                |
|            | <sup>9</sup> <input type="checkbox"/> Workshops to strengthen the resilience of staff (e.g. self-care / resource activation, "mental hygiene")          | <b>0 – 1 – 2 – 3 – 4 – 5</b>                                                                                                                |
|            | <sup>10</sup> <input type="checkbox"/> Creating a chill-out opportunities for high-stress teams                                                         | <b>0 – 1 – 2 – 3 – 4 – 5</b>                                                                                                                |

|  |                                                                                                                         |                                 |
|--|-------------------------------------------------------------------------------------------------------------------------|---------------------------------|
|  | <sup>11</sup> <input type="checkbox"/> other – what? ( <i>free text</i> ):<br>.....<br>.....<br>.....<br>.....<br>..... | <b>0 – 1 – 2 – 3 – 4</b><br>– 5 |
|--|-------------------------------------------------------------------------------------------------------------------------|---------------------------------|

|             |                                                                                                                                                                                                                                                                                                                                                                                                                                                                                           |
|-------------|-------------------------------------------------------------------------------------------------------------------------------------------------------------------------------------------------------------------------------------------------------------------------------------------------------------------------------------------------------------------------------------------------------------------------------------------------------------------------------------------|
| <b>21.</b>  | <b>Communication: How were/are the different target groups informed about the COVID-19 related psychosocial support services and offers?</b><br>( <i>multiple answers possible</i> )                                                                                                                                                                                                                                                                                                      |
| <b>21.a</b> | <b>Patients:</b>                                                                                                                                                                                                                                                                                                                                                                                                                                                                          |
|             | <sup>1</sup> <input type="checkbox"/> Flyer<br><sup>2</sup> <input type="checkbox"/> Notice board<br><sup>3</sup> <input type="checkbox"/> Internet<br><sup>4</sup> <input type="checkbox"/> In person<br><sup>5</sup> <input type="checkbox"/> Screening<br><sup>6</sup> <input type="checkbox"/> Word-of-mouth recommendation<br><sup>7</sup> <input type="checkbox"/> No special measures<br><sup>8</sup> <input type="checkbox"/> Other, if yes, which ( <i>free text</i> ):<br>..... |
| <b>21.b</b> | <b>Relatives:</b>                                                                                                                                                                                                                                                                                                                                                                                                                                                                         |
|             | <sup>1</sup> <input type="checkbox"/> Flyer<br><sup>2</sup> <input type="checkbox"/> Notice board<br><sup>3</sup> <input type="checkbox"/> Internet<br><sup>4</sup> <input type="checkbox"/> In person<br><sup>5</sup> <input type="checkbox"/> Word-of-mouth recommendation<br><sup>6</sup> <input type="checkbox"/> No special measures<br><sup>7</sup> <input type="checkbox"/> other, if yes, which ( <i>free text</i> ):<br>.....                                                    |
| <b>21.c</b> | <b>Staff:</b>                                                                                                                                                                                                                                                                                                                                                                                                                                                                             |



|  |                                                                                                                                                                                                                                                                                                                                                                                                                                                                                                                   |
|--|-------------------------------------------------------------------------------------------------------------------------------------------------------------------------------------------------------------------------------------------------------------------------------------------------------------------------------------------------------------------------------------------------------------------------------------------------------------------------------------------------------------------|
|  | <sup>1</sup> <input type="checkbox"/> Flyer<br><sup>2</sup> <input type="checkbox"/> Notice board<br><sup>3</sup> <input type="checkbox"/> Internet<br><sup>4</sup> <input type="checkbox"/> In person<br><sup>5</sup> <input type="checkbox"/> Word-of-mouth recommendation<br><sup>6</sup> <input type="checkbox"/> Information via senior executives<br><sup>7</sup> <input type="checkbox"/> No special measures<br><sup>8</sup> <input type="checkbox"/> Other, if yes, which ( <i>free text</i> ):<br>..... |
|--|-------------------------------------------------------------------------------------------------------------------------------------------------------------------------------------------------------------------------------------------------------------------------------------------------------------------------------------------------------------------------------------------------------------------------------------------------------------------------------------------------------------------|

|              |                                                                                                                                         |                        |                           |
|--------------|-----------------------------------------------------------------------------------------------------------------------------------------|------------------------|---------------------------|
| <b>22.</b>   | <b>How would you rate the <u>maximum</u> burden of the COVID-19 pandemic on your own psychosocial team in your clinic / department?</b> |                        |                           |
| <b>22.a)</b> | <b>on a scale 0 - 10 (0 = not at all stressed to 10 = extremely stressed)</b>                                                           |                        |                           |
|              | <b>not at all stressed</b>                                                                                                              | <b>0 ————— 10</b>      | <b>extremely stressed</b> |
| <b>22.b)</b> | <b>During which period was the burden highest?</b><br><i>Please indicate the period in the following format: Ex. 01/2001</i>            |                        |                           |
|              | <b>from (month/year)</b>                                                                                                                | <b>to (month/year)</b> |                           |

**Needs and wishes for the future:**

|            |                                                                                                                                                  |
|------------|--------------------------------------------------------------------------------------------------------------------------------------------------|
| <b>23.</b> | <b>Do you or your team have any wishes for exchange/support regarding psychosocial care in the COVID 19 context?</b>                             |
|            | <sup>1</sup> <input type="checkbox"/> no<br><sup>2</sup> <input type="checkbox"/> yes – If yes, which ones? ( <i>multiple answers possible</i> ) |

|  |                                                                                                                                                                                                                                                                                                                                                                                                                                                                                                                                                                                                                                                                                                                                                                                       |
|--|---------------------------------------------------------------------------------------------------------------------------------------------------------------------------------------------------------------------------------------------------------------------------------------------------------------------------------------------------------------------------------------------------------------------------------------------------------------------------------------------------------------------------------------------------------------------------------------------------------------------------------------------------------------------------------------------------------------------------------------------------------------------------------------|
|  | <sup>3</sup> <input type="checkbox"/> Exchange of experience with other clinics / departments / hospitals<br><sup>4</sup> <input type="checkbox"/> Exchange on specific procedures / Standard Operation Procedures (SOPs) for common issues<br><sup>5</sup> <input type="checkbox"/> Exchange on care structures<br><sup>6</sup> <input type="checkbox"/> Exchange on staff support<br><sup>7</sup> <input type="checkbox"/> Exchange on support for relatives<br><sup>8</sup> <input type="checkbox"/> To visit another clinic / department / hospital<br><sup>9</sup> <input type="checkbox"/> Further training on psychosocial issues in the context of COVID-19<br><sup>10</sup> <input type="checkbox"/> other – If yes, which? ( <i>free text</i> ):<br>.....<br>.....<br>..... |
|--|---------------------------------------------------------------------------------------------------------------------------------------------------------------------------------------------------------------------------------------------------------------------------------------------------------------------------------------------------------------------------------------------------------------------------------------------------------------------------------------------------------------------------------------------------------------------------------------------------------------------------------------------------------------------------------------------------------------------------------------------------------------------------------------|

|            |                                                                                                                                                                                                                                                                                                                                                                                                                                                                                                                                                                                                                                                                                    |
|------------|------------------------------------------------------------------------------------------------------------------------------------------------------------------------------------------------------------------------------------------------------------------------------------------------------------------------------------------------------------------------------------------------------------------------------------------------------------------------------------------------------------------------------------------------------------------------------------------------------------------------------------------------------------------------------------|
| <b>24.</b> | <b>Are there any changes / improvements that you consider essential for the future with regard to psychosocial care services in your hospital in the COVID-19 context?</b>                                                                                                                                                                                                                                                                                                                                                                                                                                                                                                         |
|            | <sup>1</sup> <input type="checkbox"/> no<br><sup>2</sup> <input type="checkbox"/> yes – If yes, which ones? ( <i>multiple answers possible</i> )                                                                                                                                                                                                                                                                                                                                                                                                                                                                                                                                   |
|            | <sup>3</sup> <input type="checkbox"/> with regard to care structures<br><sup>4</sup> <input type="checkbox"/> with regard to interdepartmental cooperation<br><sup>5</sup> <input type="checkbox"/> with regard to interprofessional cooperation<br><sup>6</sup> <input type="checkbox"/> with regard to the staff provided<br><sup>7</sup> <input type="checkbox"/> with regard to information processes (announcement of offers, etc.)<br><sup>8</sup> <input type="checkbox"/> with regard to offers to alleviate the workload of the consultation-liaison team<br><sup>9</sup> <input type="checkbox"/> other – if yes, what? ( <i>free text</i> ):<br>.....<br>.....<br>..... |

|            |                                                                                                                                                                           |
|------------|---------------------------------------------------------------------------------------------------------------------------------------------------------------------------|
| <b>25.</b> | <b>From your point of view, are there any other aspects in the COVID-19 context that are relevant to the consultation-liaison service and that you would like to add?</b> |
|            | <sup>1</sup> <input type="checkbox"/> no<br><sup>2</sup> <input type="checkbox"/> yes                                                                                     |
|            | If yes, which ones? ( <i>free text</i> ):<br>.....<br>.....<br>.....                                                                                                      |

**Thank you very much for your participation in this online survey!**

**In case of any questions, please do not hesitate to contact us:**

**eMail:** [covid-survey-medizin@unibas.ch](mailto:covid-survey-medizin@unibas.ch)
